# Supplementary material for: Soluble Forms of Immune Checkpoints and Their Ligands as Potential Biomarkers in the Diagnosis of Recurrent Pregnancy Loss—A Preliminary Study
Source: MDPI journal article supplement (doi:10.3390/ijms25010499), 2023-12-29
Supplement: s1 [file s1]

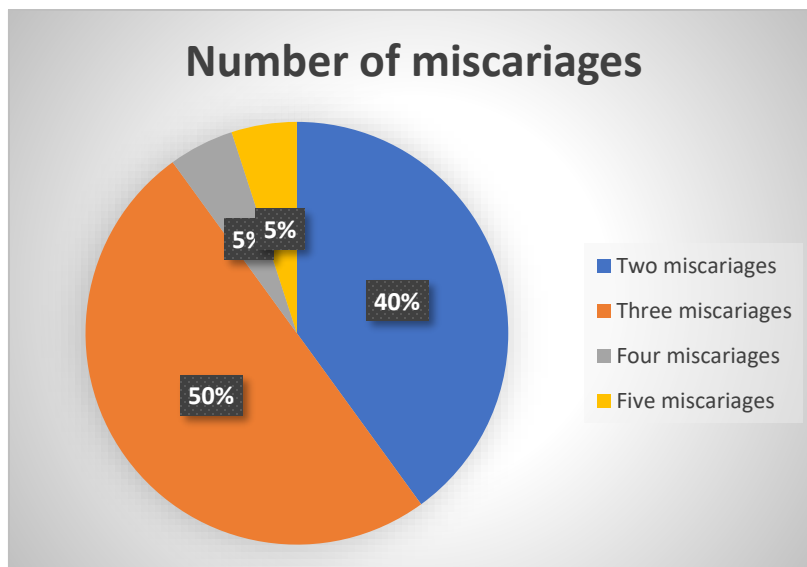

**Figure S1.** Precise presentation of the number of miscarriages in the RSA group n=20.

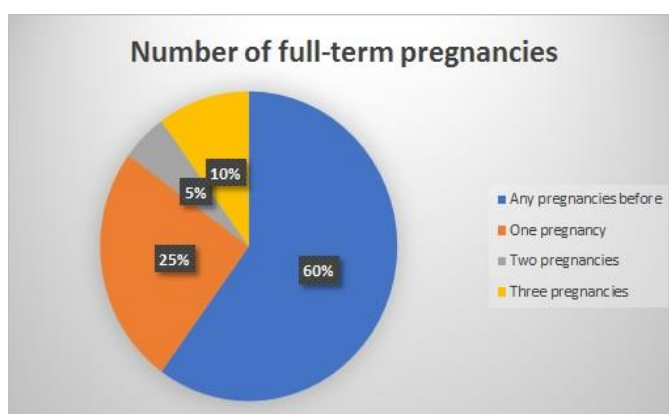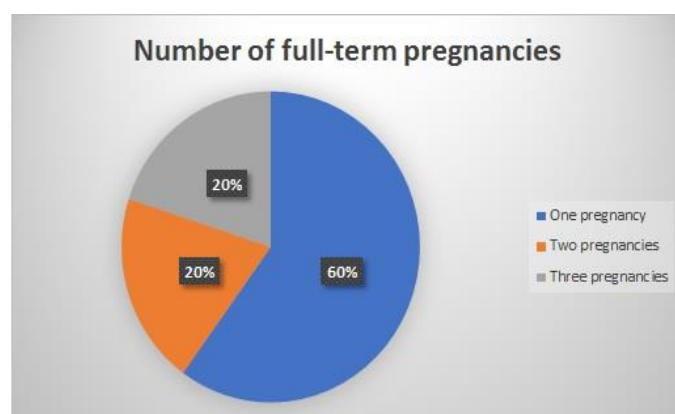

**Figure S2.** Precise presentation of the number of delivered pregnancies in the pregnant and non-pregnant group as percentage of the whole group, Pregnant n=20, non-pregnant n=10.

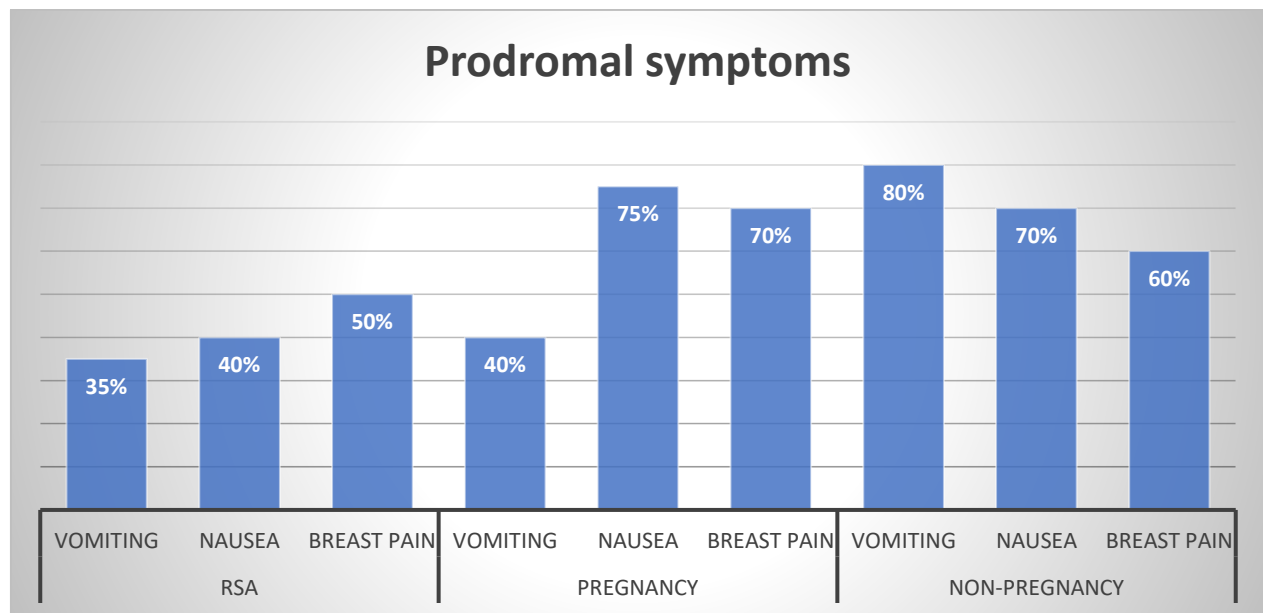

**Figure S3.** Rate of prodromal syndromes (vomiting, nausea, breast pain) in groups, RSA n=20, Pregnant n=20, non-pregnant n=10. Data showed as percentage.

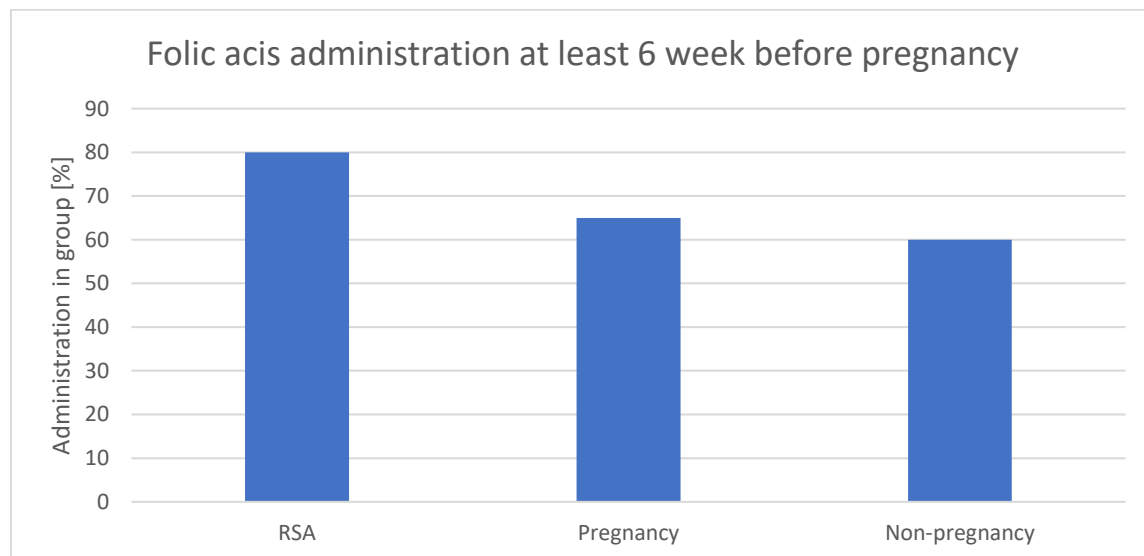

**Figure S4.** Folic acid administration by women in all studied group at least 6 weeks before pregnancy, RSA n=20, Pregnant n=20, non-pregnant n=10 . Data showed as percentage.

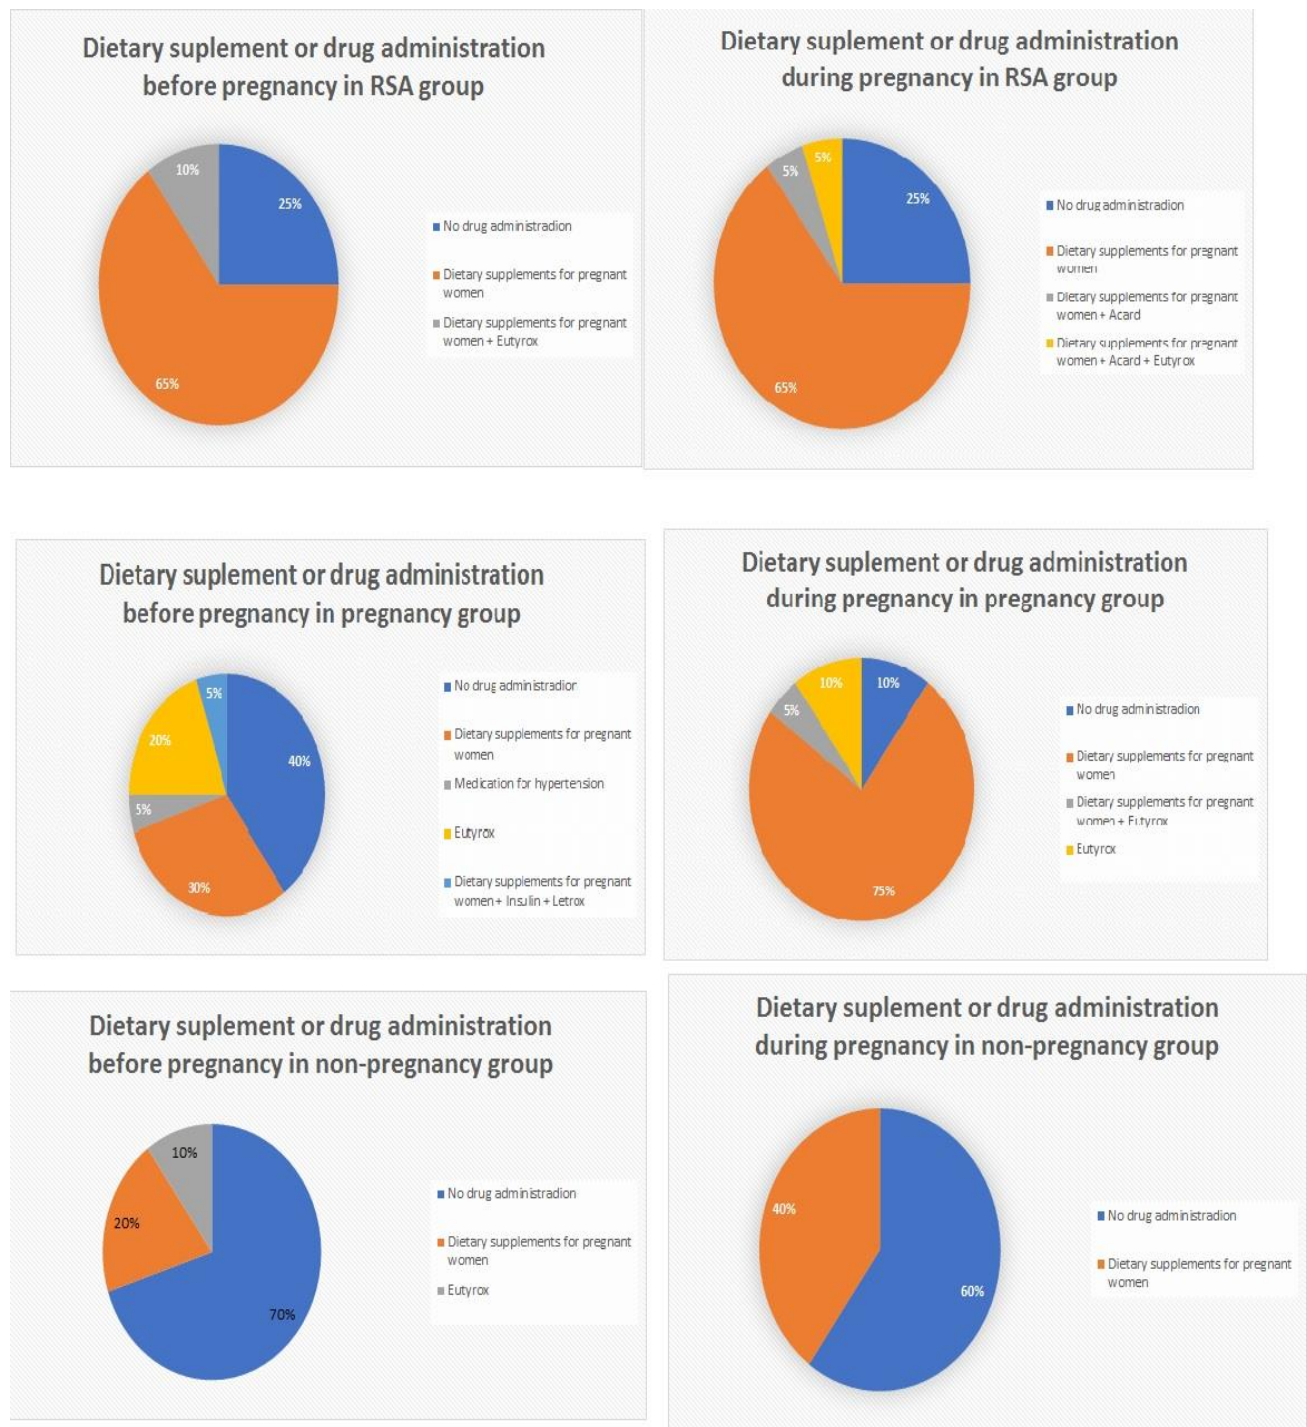

**Figure S5. Drug administration by women in all studied group before and during pregnancy RSA n=20, Pregnant n=20, non-pregnant n=10. Data showed as percentage.**

**Tabela S1. Lower Limit of Quantification (LLOQ) and Upper Limit of Quantification (ULOQ) values for tested sICPs using the Luminex device. Data showed as concentration, pg/ml.**

| sICP      | ULOQ [pg/ml] | LLOQ [pg/ml] |
|-----------|--------------|--------------|
| sVISTA    | 8850 pg/ml   | 8,64 pg/ml   |
| sCD28     | 133000 pg/ml | 32 pg/ml     |
| sCD80     | 17130 pg/ml  | 4,2 pg/ml    |
| sLAG      | 50900 ng/ml  | 12 ng/ml     |
| sPD-1     | 28600 pg/ml  | 6,98 pg/ml   |
| sPD-L1    | 14300 pg/ml  | 3,49 pg/ml   |
| sPD-L2    | 185400 pg/ml | 45 pg/ml     |
| sTIM-3    | 244100 pg/ml | 60 pg/ml     |
| sCD155    | 30250 ng/ml  | 3,45 ng/ml   |
| sNectin-2 | 50225 pg/ml  | 49 pg/ml     |
| sHVEM     | 61500 pg/ml  | 15 pg/ml     |
| sCD86     | 2600 pg/ml   | 2,48 pg/ml   |
| sCTLA-4   | 8775 pg/ml   | 1,57 pg/ml   |
